# Supplementary material for: The Role of the MYC/miR-150/MYB/ZDHHC11 Network in Hodgkin Lymphoma and Diffuse Large B-Cell Lymphoma
Source: MDPI journal article supplement (doi:10.3390/genes13020227), 2022-01-25
Supplement: s1 [file s1]

**Supplementary Table S1. Cell lines and culturing media**

|           | Type                               | EBV | Origin | Culturing media | FBS |
|-----------|------------------------------------|-----|--------|-----------------|-----|
| HEK 293T  | human embryonic kidney cell        | -   | ATCC   | DMEM            | 10% |
| DG75      | BL                                 | -   | DSMZ   | RPMI-1640       | 10% |
| CA46      | BL                                 | -   | DSMZ   | RPMI-1640       | 10% |
| ST486     | BL                                 | -   | ATCC   | RPMI-1640       | 20% |
| BL41      | BL                                 | -   | DSMZ   | RPMI-1640       | 10% |
| BL65      | BL                                 | +   | [1]    | RPMI-1640       | 20% |
| Namalwa   | BL                                 | +   | DSMZ   | RPMI-1640       | 10% |
| Jijoye    | BL                                 | +   | DSMZ   | RPMI-1640       | 10% |
| Raji      | BL                                 | +   | DSMZ   | RPMI-1640       | 10% |
| Ramos     | BL                                 | -   | ATCC   | RPMI-1640       | 10% |
| L428      | HL, nodular sclerosis              | -   | DSMZ   | RPMI-1640       | 10% |
| L1236     | HL, mixed cellularity              | -   | DSMZ   | RPMI-1640       | 10% |
| KMH2      | HL, mixed cellularity              | -   | DSMZ   | RPMI-1640       | 10% |
| DEV       | HL, nodular lymphocyte-predominant | -   | [2]    | RPMI-1640       | 20% |
| L540      | HL, nodular sclerosis              | -   | DSMZ   | RPMI-1640       | 20% |
| L591      | HL, nodular sclerosis              | +   | DSMZ   | RPMI-1640       | 10% |
| SUPHD1    | HL, nodular sclerosis              | -   | DSMZ   | McCoy 5A        | 20% |
| HDLM2     | HL, nodular sclerosis              | -   | DSMZ   | RPMI-1640       | 10% |
| U2932     | DLBCL, ABC                         | -   | DSMZ   | RPMI-1640       | 10% |
| Ocily3    | DLBCL, ABC                         | -   | DSMZ   | RPMI-1640       | 20% |
| SUDHL16   | DLBCL, GCB                         | -   | DSMZ   | RPMI-1640       | 20% |
| SUDHL10   | DLBCL, GCB                         | -   | DSMZ   | RPMI-1640       | 20% |
| SUDHL6    | DLBCL, GCB                         | -   | DSMZ   | RPMI-1640       | 10% |
| SUDHL5    | DLBCL, GCB                         | -   | DSMZ   | RPMI-1640       | 10% |
| SUDHL4    | DLBCL, GCB                         | -   | DSMZ   | RPMI-1640       | 10% |
| SUDHL2    | DLBCL, ABC                         | -   | DSMZ   | RPMI-1640       | 20% |
| WSU-DLCL2 | DLBCL, GCB                         | -   | DSMZ   | RPMI-1640       | 10% |

1. Lenoir GM, Vuillaume M, Bonnardel C. The use of lymphomatous and lymphoblastoid cell lines in the study of Burkitt's lymphoma. IARC Sci Publ. 1985;(60):309-18. PMID: 3934070.
2. Atayar C, Kok K, Kluiver J, Bosga A, van den Berg E, van der Vlies P, Blokzijl T, Harms G, Davelaar I, Sikkema-Raddatz B, Martin-Subero JI, Siebert R, Poppema S, van den Berg A. BCL6 alternative breakpoint region break and homozygous deletion of 17q24 in the nodular lymphocyte predominance type of Hodgkin's lymphoma-derived cell line DEV. Hum Pathol. 2006 Jun;37(6):675-83. doi: 10.1016/j.humpath.2006.01.018. PMID: 16733207.

**Supplementary Table S2. Sequences of the qRT-PCR primers**

| Name          | Sequence (5'-3')            |
|---------------|-----------------------------|
| MYC-F         | GCTCATTCTGAAGAGGACTTGTTG    |
| MYC-R         | TTACGCACAACACTTCCGTAGCT     |
| MYB-F         | CCAACTGTTACGCAGACCT         |
| MYB-R         | CTTCTGATGCTGGTGCCATT        |
| ZDHHC11_ALL-F | CACTTGGGCTGCAACAAGAA        |
| ZDHHC11_ALL-R | GGTGGGGTTTCAGGGTAGAAG       |
| pcZDHHC11-F   | TGTCGAGCACTCCCCAGA          |
| pcZDHHC11-R   | GCAACGGAAAACGGCTCTC         |
| IncZDHHC11-F  | AGCACTTCCTGAAAGCCAGC        |
| IncZDHHC11-R  | GAAGAACGCAACAGGCATCG        |
| circZDHHC11-F | GGCATCCTCTGTATTTTAATGAACTCT |
| circZDHHC11-R | GTTGCAGCCAGAAGCCAAG         |
| U6-F          | TGGAACGATACAGAGAAGATTAGCA   |
| U6-R          | AAAATATGGAACGCTTCACGAATT    |

F = forward primer, R = reverse primer, S = sense sequence, AS = antisense sequence.

**Supplementary Table S3. Antibodies used for western blot analysis.**

| <b>Name</b>                                                      | <b>Dilution</b> | <b>Catalog number, company</b>   |
|------------------------------------------------------------------|-----------------|----------------------------------|
| rabbit monoclonal anti-c-MYC [Y69]                               | 1:1000          | ab32072, Abcam, Cambridge, UK    |
| rat monoclonal anti-c-Myb [ANA236B] (C-terminal)                 | 1:500           | ab169111, Abcam, Cambridge, UK   |
| rabbit monoclonal anti-c-Myb (phospho S11) [EP769Y] (N-terminal) | 1:500           | ab45150, Abcam, Cambridge, UK    |
| mouse monoclonal anti-GAPDH antibody                             | 1:50000         | NB600-502, Novus Biologicals, UK |
| mouse monoclonal anti-AGO2 antibody (clone 2E12-1C9)             | 1:400           | H00027161-M01, Abnova, Taiwan    |
| goat anti-Rabbit Immunoglobulins/HRP                             | 1:1000          | P0448, Dako, USA                 |
| goat anti-mouse Immunoglobulins/HRP                              | 1:1000          | P0447, Dako, USA                 |
| rabbit anti-goat immunoglobulins/HRP                             | 1:1000          | P0449, Dako, USA                 |

**Supplementary Table S4. MiR-150 target genes identified by AGO2-RIP-Chip in L428 and SUPHD1-miR-150 cells.**

| Probe name         | Gene symbol    | L428             |             |               | SUPHD1           |             |               |
|--------------------|----------------|------------------|-------------|---------------|------------------|-------------|---------------|
|                    |                | miR-150<br>IP/TF | EV<br>IP/TF | miR150/E<br>V | miR-150<br>IP/TF | EV<br>IP/TF | miR150/E<br>V |
| A_24_P153456       | ZDHHC11        | 26.7             | 1.0         | 26.7          | 5.7              | 1.0         | 5.7           |
| A_33_P3344204      | ZDHHC11        | 25.5             | 1.0         | 25.5          | 6.4              | 1.0         | 6.4           |
| A_33_P3345643      | ZDHHC11B       | 22.5             | 1.0         | 22.5          | 6.2              | 1.0         | 6.2           |
| A_23_P31073        | MYB            | 4.2              | 1.0         | 4.2           | 4.5              | 1.1         | 4.1           |
| A_23_P20882        | ATP6V1G1       | 2.2              | 1.0         | 2.2           | 2.5              | 1.0         | 2.5           |
| A_23_P80778        | DIRC2          | 4.7              | 2.3         | 2.0           | 10.5             | 4.9         | 2.1           |
| A_23_P115467       | S100A5         | 6.0              | 1.0         | 6.0           | 1.0              | #N/A        | #N/A          |
| A_21_P0001246      | LOC101927851   | 8.8              | 1.5         | 5.8           | 1.0              | 2.5         | 0.4           |
| A_21_P0007561      | XLOC_009764    | 14.1             | 2.7         | 5.2           | #N/A             | #N/A        | #N/A          |
| A_21_P0000463      | SNORD105B      | 15.5             | 3.2         | 4.9           | 1.0              | 1.2         | 0.8           |
| A_21_P0000260      | SNORD58A       | 9.9              | 2.0         | 4.9           | 1.0              | 1.3         | 0.8           |
| A_33_P3243405      | GPR182         | 16.0             | 3.4         | 4.8           | #N/A             | #N/A        | #N/A          |
| A_33_P3419945      | Lnc-PTPN9-1    | 9.1              | 2.1         | 4.3           | 1.7              | 2.3         | 0.7           |
| A_21_P0000361      | SNORA79        | 7.7              | 1.8         | 4.2           | #N/A             | #N/A        | #N/A          |
| A_23_P136870       | MAGEA6         | 4.2              | 1.0         | 4.2           | #N/A             | #N/A        | #N/A          |
| A_33_P3249529      | PCNX           | 8.6              | 2.0         | 4.2           | 1.0              | 1.0         | 1.0           |
| A_21_P0000354      | SCARNA8        | 8.8              | 2.1         | 4.2           | 5.0              | 9.2         | 0.5           |
| A_21_P0011028      | LOC102724910   | 11.0             | 2.7         | 4.1           | 1.7              | 2.6         | 0.6           |
| A_33_P7314857      | LOC100506085   | 4.0              | 1.0         | 4.0           | #N/A             | #N/A        | #N/A          |
| A_33_P3278220      | RABEPK         | 10.3             | 2.6         | 4.0           | 1.2              | 2.2         | 0.6           |
| A_33_P3367396      | FAM177B        | 4.0              | 1.0         | 4.0           | #N/A             | #N/A        | #N/A          |
| A_21_P0008515      | XLOC_010856    | 15.3             | 4.0         | 3.9           | 1.0              | 1.0         | 1.0           |
| A_22_P0002524<br>9 | lnc-CEACAM18-2 | 3.8              | 1.0         | 3.8           | 1.0              | 1.0         | 1.0           |
| A_21_P0000494      | SNORA16B       | 29.6             | 7.8         | 3.8           | 1.5              | 5.2         | 0.3           |
| A_19_P0031571<br>6 | SNORA71A       | 10.1             | 2.6         | 3.8           | 1.3              | 2.1         | 0.6           |
| A_22_P0000690<br>1 | SCARNA10       | 5.4              | 1.4         | 3.8           | 1.2              | 1.8         | 0.7           |
| A_22_P0001438<br>2 | lnc-SEZ6L2-1   | 6.3              | 1.7         | 3.8           | 1.1              | 1.9         | 0.5           |
| A_22_P0002511<br>5 | LINC02332      | 4.0              | 1.1         | 3.7           | 1.0              | 1.0         | 1.0           |
| A_33_P3417459      | SCARNA9L       | 3.7              | 1.0         | 3.7           | #N/A             | #N/A        | #N/A          |
| A_21_P0014782      | LOC105376108   | 3.7              | 1.0         | 3.7           | 1.0              | 1.0         | 1.0           |

|                    |                    |      |     |     |      |      |      |
|--------------------|--------------------|------|-----|-----|------|------|------|
| A_22_P0002214<br>1 | lnc-TLCD2-2        | 3.7  | 1.0 | 3.6 | 1.0  | #N/A | #N/A |
| A_22_P0000156<br>1 | lncRNA             | 4.4  | 1.2 | 3.6 | 1.9  | 2.2  | 0.8  |
| A_21_P0000356      | SCARNA11           | 19.0 | 5.2 | 3.6 | 6.3  | 10.8 | 0.6  |
| A_33_P3267612      | MIR143HG           | 4.5  | 1.2 | 3.6 | 1.0  | 1.0  | 1.0  |
| A_21_P0004252      | lnc-SNX18-1        | 10.0 | 2.8 | 3.6 | #N/A | #N/A | #N/A |
| A_33_P3288871      | SLC38A1            | 3.6  | 1.0 | 3.6 | #N/A | #N/A | #N/A |
| A_33_P3366493      | TPD52L2 pseudogene | 4.0  | 1.1 | 3.6 | #N/A | #N/A | #N/A |
| A_21_P0005184      | lnc-WDR27-1        | 3.6  | 1.0 | 3.6 | 1.0  | 1.0  | 1.0  |
| A_22_P0002098<br>0 | lnc-C7orf45-1      | 3.6  | 1.0 | 3.6 | 1.0  | #N/A | #N/A |
| A_22_P0001803<br>6 | lnc-ZNF236-1       | 4.1  | 1.2 | 3.5 | 1.0  | 1.0  | 1.0  |
| A_33_P3236416      | GPR179             | 10.3 | 2.9 | 3.5 | 1.0  | 1.0  | 1.0  |
| A_21_P0008478      | lnc-SERPINA12-1    | 3.8  | 1.1 | 3.5 | #N/A | #N/A | #N/A |
| A_21_P0000222      | SNORD46            | 6.0  | 1.7 | 3.5 | #N/A | #N/A | #N/A |
| A_21_P0000563      | SNORA80B           | 15.2 | 4.4 | 3.5 | 3.5  | 7.0  | 0.5  |
| A_33_P3331426      | XLOC_I2_008130     | 9.7  | 2.8 | 3.5 | 1.3  | 2.0  | 0.7  |
| A_21_P0010155      | LOC284825          | 6.8  | 2.0 | 3.4 | 1.8  | 3.0  | 0.6  |
| A_21_P0011549      | XLOC_I2_005871     | 3.4  | 1.0 | 3.4 | 1.0  | 1.1  | 0.9  |
| A_33_P3215557      | ADAMTS7            | 3.4  | 1.0 | 3.4 | 1.0  | 1.0  | 1.0  |
| A_33_P3219459      | TMEM240            | 3.4  | 1.0 | 3.4 | 1.0  | #N/A | #N/A |
| A_21_P0000310      | SNORA12            | 18.7 | 5.5 | 3.4 | 3.5  | 6.7  | 0.5  |
| A_33_P3291776      | NANS               | 3.4  | 1.0 | 3.4 | 1.9  | 1.0  | 1.9  |
| A_21_P0007229      | lncRNA             | 9.2  | 2.7 | 3.4 | 1.0  | 1.0  | 1.0  |
| A_21_P0000386      | SNORD89            | 5.6  | 1.7 | 3.4 | #N/A | #N/A | #N/A |
| A_33_P3346680      | CDC37P2            | 3.4  | 1.0 | 3.4 | 1.0  | 1.0  | 1.0  |
| A_22_P0001031<br>9 | lnc-MUC5B-1        | 3.3  | 1.0 | 3.3 | #N/A | #N/A | #N/A |
| A_23_P140967       | MEFV               | 3.3  | 1.0 | 3.3 | 1.0  | #N/A | #N/A |
| A_21_P0000351      | SCARNA22           | 10.2 | 3.0 | 3.3 | 1.8  | 3.4  | 0.5  |
| A_21_P0000359      | SNORA71D           | 5.7  | 1.7 | 3.3 | 1.0  | 1.2  | 0.8  |
| A_21_P0000317      | SNORA22            | 23.4 | 7.1 | 3.3 | 3.7  | 11.0 | 0.3  |
| A_21_P0000350      | SCARNA20           | 5.2  | 1.6 | 3.3 | 1.5  | 1.8  | 0.9  |
| A_21_P0000262      | SNORA27            | 18.6 | 5.7 | 3.3 | 8.1  | 22.9 | 0.4  |
| A_22_P0001268<br>7 | LOC100507156       | 3.3  | 1.0 | 3.3 | 1.0  | 1.0  | 1.0  |
| A_33_P3628409      | PKI55              | 3.3  | 1.0 | 3.3 | 1.0  | #N/A | #N/A |
| A_23_P129413       | DPEP3              | 3.3  | 1.0 | 3.3 | 1.0  | 1.0  | 1.0  |
| A_21_P0006193      | lnc-STX17-1        | 3.2  | 1.0 | 3.2 | #N/A | #N/A | #N/A |
| A_21_P0007890      | lncRNA             | 3.3  | 1.0 | 3.2 | 1.0  | 1.0  | 1.0  |

|                    |              |      |      |     |      |      |      |
|--------------------|--------------|------|------|-----|------|------|------|
| A_33_P3299140      | GTF3C5       | 3.2  | 1.0  | 3.2 | #N/A | #N/A | #N/A |
| A_23_P44956        | RPL35A       | 4.6  | 1.4  | 3.2 | 1.9  | 1.2  | 1.6  |
| A_21_P0000353      | SCARNA23     | 13.2 | 4.1  | 3.2 | 1.6  | #N/A | #N/A |
| A_21_P0000477      | SNORA11B     | 17.2 | 5.4  | 3.2 | 4.2  | 7.3  | 0.6  |
| A_24_P504621       | HIGD1AP11    | 3.2  | 1.0  | 3.2 | #N/A | #N/A | #N/A |
| A_33_P3265866      | PYY3         | 3.5  | 1.1  | 3.2 | #N/A | #N/A | #N/A |
| A_24_P233078       | PYY2         | 4.0  | 1.3  | 3.1 | 1.0  | 1.0  | 1.0  |
| A_33_P3337627      | TRPC6        | 5.9  | 1.9  | 3.1 | 1.5  | 2.4  | 0.6  |
| A_22_P0001174<br>3 | lnc-PER2-1   | 3.1  | 1.0  | 3.1 | 1.0  | 1.0  | 1.0  |
| A_33_P3231923      | LOC101927285 | 6.9  | 2.2  | 3.1 | 1.4  | 1.8  | 0.8  |
| A_21_P0000322      | SNORA34      | 39.2 | 12.6 | 3.1 | 8.8  | 23.6 | 0.4  |
| A_21_P0000478      | SNORA11C     | 15.2 | 4.9  | 3.1 | 6.2  | 6.7  | 0.9  |
| A_24_P21770        | YPEL4        | 3.4  | 1.1  | 3.1 | 1.0  | 1.0  | 1.0  |
| A_22_P0001164<br>3 | lnc-PDCD11-2 | 3.1  | 1.0  | 3.1 | 1.0  | 1.0  | 1.0  |
| A_23_P27133        | KRT15        | 3.1  | 1.0  | 3.1 | 1.0  | 1.0  | 1.0  |
| A_23_P49674        | ARHGEF15     | 6.1  | 2.0  | 3.1 | 1.0  | 1.6  | 0.6  |
| A_23_P50815        | TTYH1        | 3.1  | 1.0  | 3.1 | 1.0  | 1.0  | 1.0  |
| A_22_P0000184<br>7 | THOC7-AS1    | 7.3  | 2.4  | 3.1 | 1.4  | 1.9  | 0.7  |
| A_23_P416314       | HRASLS5      | 5.0  | 1.6  | 3.1 | 1.3  | 1.7  | 0.7  |
| A_21_P0013455      | ZNF767P      | 8.6  | 2.8  | 3.1 | 1.0  | #N/A | #N/A |
| A_33_P3271196      | AMOTL1       | 3.3  | 1.1  | 3.1 | 1.0  | 1.0  | 1.0  |
| A_19_P0031596<br>7 | MLYCD        | 3.2  | 1.0  | 3.1 | #N/A | #N/A | #N/A |
| A_33_P3302428      | TNRC6C       | 5.2  | 1.7  | 3.0 | 1.2  | 1.8  | 0.7  |
| A_21_P0000867      | ZBTB20-AS1   | 4.5  | 1.5  | 3.0 | 1.2  | 1.8  | 0.7  |
| A_33_P3415491      | WDR90        | 3.0  | 1.0  | 3.0 | 1.0  | 1.0  | 1.0  |
| A_33_P3363082      | SCARNA5      | 7.3  | 2.4  | 3.0 | 4.2  | 7.5  | 0.6  |
| A_33_P3849275      | FHL1         | 3.0  | 1.0  | 3.0 | 1.0  | 1.0  | 1.0  |
| A_22_P0001895<br>0 | TMEM231      | 3.0  | 1.0  | 3.0 | 1.0  | 1.0  | 1.0  |
| A_22_P0000767<br>3 | lnc-HIATL1-1 | 3.4  | 1.1  | 3.0 | 1.0  | 1.0  | 1.0  |
| A_33_P3327140      | lncRNA       | 8.0  | 2.7  | 3.0 | 1.5  | 1.9  | 0.8  |
| A_33_P3214803      | PRDM13       | 3.0  | 1.0  | 3.0 | 1.0  | 1.0  | 1.0  |
| A_33_P3709317      | SNORA28      | 15.1 | 5.1  | 3.0 | 26.7 | 35.0 | 0.8  |
| A_21_P0011923      | WDPCP        | 3.0  | 1.0  | 3.0 | 1.0  | 1.0  | 1.0  |
| A_19_P0080243<br>3 | LINC01564    | 11.0 | 3.7  | 3.0 | 1.0  | 1.0  | 1.0  |
| A_21_P0005807      | lnc-GFRA2-1  | 8.9  | 3.0  | 3.0 | 1.0  | #N/A | #N/A |

|                    |               |      |      |     |      |      |      |
|--------------------|---------------|------|------|-----|------|------|------|
| A_19_P0080883<br>4 | LINC01478     | 3.0  | 1.0  | 3.0 | #N/A | #N/A | #N/A |
| A_21_P0011822      | lnc-ZAP70-2   | 3.2  | 1.1  | 2.9 | #N/A | #N/A | #N/A |
| A_23_P50146        | SIGLEC15      | 3.4  | 1.1  | 2.9 | 1.0  | 1.0  | 1.0  |
| A_33_P3334180      | PLCH2         | 3.3  | 1.1  | 2.9 | 1.0  | 1.0  | 1.0  |
| A_19_P0080173<br>5 | SEPT7-AS1     | 3.1  | 1.1  | 2.9 | 1.0  | 1.0  | 1.0  |
| A_24_P152468       | LOC100128364  | 3.0  | 1.0  | 2.9 | 1.0  | 1.0  | 1.0  |
| A_22_P0000656<br>7 | lnc-FLYWCH2-1 | 3.0  | 1.0  | 2.9 | #N/A | #N/A | #N/A |
| A_21_P0000340      | SNORA60       | 4.2  | 1.4  | 2.9 | 1.1  | 2.2  | 0.5  |
| A_23_P396981       | CCDC66        | 4.0  | 1.4  | 2.9 | 1.0  | #N/A | #N/A |
| A_33_P3351606      | MIR124-2HG    | 2.9  | 1.0  | 2.9 | 1.0  | 1.0  | 1.0  |
| A_33_P3271975      | LOC100132368  | 2.9  | 1.0  | 2.9 | 1.0  | #N/A | #N/A |
| A_23_P68910        | SSTR3         | 3.6  | 1.2  | 2.9 | 1.0  | 1.0  | 1.0  |
| A_24_P924862       | RAPH1         | 3.6  | 1.3  | 2.9 | 1.5  | 1.4  | 1.1  |
| A_21_P0000237      | SNORA10       | 6.2  | 2.2  | 2.9 | 2.1  | 3.5  | 0.6  |
| A_21_P0009268      | lnc-MAP2K6-2  | 11.5 | 4.0  | 2.9 | 1.0  | 1.0  | 1.0  |
| A_22_P0001744<br>6 | lnc-VPS4A-1   | 3.9  | 1.4  | 2.9 | 1.0  | 1.0  | 1.0  |
| A_33_P3236340      | LOC100133131  | 4.2  | 1.5  | 2.9 | 1.6  | 2.3  | 0.7  |
| A_22_P0000347<br>1 | lnc-CCDC69-1  | 2.9  | 1.0  | 2.9 | #N/A | #N/A | #N/A |
| A_21_P0000336      | SNORA54       | 31.2 | 11.0 | 2.8 | 22.8 | 30.0 | 0.8  |
| A_33_P3311046      | OR2M7         | 2.8  | 1.0  | 2.8 | #N/A | #N/A | #N/A |
| A_22_P0000931<br>6 | LOC100507205  | 3.3  | 1.2  | 2.8 | 1.0  | 1.4  | 0.7  |
| A_21_P0000324      | SNORA36A      | 7.7  | 2.7  | 2.8 | #N/A | #N/A | #N/A |
| A_33_P3403643      | LOC101059906  | 2.9  | 1.0  | 2.8 | 1.0  | 1.0  | 1.0  |
| A_33_P3322192      | RP11-74K11.1  | 2.8  | 1.0  | 2.8 | 1.0  | 1.0  | 1.0  |
| A_33_P3882624      | POT1          | 3.1  | 1.1  | 2.8 | 1.0  | 1.0  | 1.0  |
| A_24_P47681        | CAND1         | 4.1  | 1.5  | 2.8 | 1.0  | 1.3  | 0.8  |
| A_21_P0012967      | CTC-338M12.9  | 3.6  | 1.3  | 2.8 | 1.0  | 1.0  | 1.0  |
| A_22_P0001623<br>5 | SNORD57       | 7.5  | 2.7  | 2.8 | 1.0  | 1.0  | 1.0  |
| A_21_P0000212      | SNORA68       | 5.9  | 2.1  | 2.8 | 1.8  | 4.0  | 0.4  |
| A_21_P0007854      | lnc-HNF1A-1   | 12.3 | 4.4  | 2.8 | 1.0  | 1.0  | 1.0  |
| A_21_P0003889      | FLJ36777      | 3.0  | 1.1  | 2.8 | #N/A | #N/A | #N/A |
| A_23_P42288        | VWA7          | 3.1  | 1.1  | 2.8 | 1.0  | 1.0  | 1.0  |
| A_33_P3391375      | LANCL3        | 6.4  | 2.3  | 2.8 | 1.6  | 2.0  | 0.8  |
| A_19_P0032178<br>9 | RP3-523C21.2  | 2.8  | 1.0  | 2.8 | 1.0  | 1.0  | 1.0  |

|                    |                |      |     |     |      |      |      |
|--------------------|----------------|------|-----|-----|------|------|------|
| A_22_P0000519<br>1 | lnc-DKK3-1     | 2.9  | 1.0 | 2.7 | 1.0  | 1.0  | 1.0  |
| A_32_P207243       | LOC100134253   | 26.1 | 9.5 | 2.7 | 3.7  | 9.6  | 0.4  |
| A_21_P0000493      | SCARNA14       | 8.8  | 3.2 | 2.7 | 4.2  | 6.7  | 0.6  |
| A_33_P3335576      | LOC100287006   | 2.7  | 1.0 | 2.7 | 1.0  | #N/A | #N/A |
| A_33_P3274245      | ENDOV          | 3.5  | 1.3 | 2.7 | 1.0  | #N/A | #N/A |
| A_33_P3368109      | EIF4BP3        | 2.7  | 1.0 | 2.7 | 1.0  | 1.0  | 1.0  |
| A_21_P0000308      | SNORA9         | 8.3  | 3.1 | 2.7 | 4.3  | 9.5  | 0.5  |
| A_23_P119448       | PPP6R1         | 10.7 | 3.9 | 2.7 | 1.0  | 1.0  | 1.0  |
| A_19_P0080581<br>2 | lnc-UQCRFS1-9  | 11.1 | 4.1 | 2.7 | #N/A | #N/A | #N/A |
| A_33_P3386686      | LOC100132874   | 2.7  | 1.0 | 2.7 | 1.0  | 1.0  | 1.0  |
| A_21_P0009285      | lnc-C1QTNF1-1  | 2.7  | 1.0 | 2.7 | 1.0  | #N/A | #N/A |
| A_33_P3312504      | PSD4           | 2.7  | 1.0 | 2.7 | 1.0  | 1.0  | 1.0  |
| A_21_P0011573      | AC004448.5     | 2.7  | 1.0 | 2.7 | 1.0  | 1.0  | 1.0  |
| A_23_P115573       | SHISA4         | 2.7  | 1.0 | 2.7 | 1.0  | 1.0  | 1.0  |
| A_22_P0000310<br>7 | lnc-MFAP4-3    | 2.7  | 1.0 | 2.7 | 1.0  | 1.0  | 1.0  |
| A_33_P3356577      | SIRPB1         | 2.7  | 1.0 | 2.7 | 1.0  | 1.0  | 1.0  |
| A_33_P3629247      | ANKMY1         | 3.2  | 1.2 | 2.7 | 1.0  | 1.2  | 0.9  |
| A_22_P0000248<br>6 | lnc-C16orf13-3 | 3.0  | 1.1 | 2.7 | 1.0  | 1.0  | 1.0  |
| A_24_P307289       | TMEM95         | 3.5  | 1.3 | 2.7 | 1.0  | 1.0  | 1.0  |
| A_21_P0000325      | SNORA37        | 15.7 | 5.9 | 2.7 | 5.0  | 9.3  | 0.5  |
| A_21_P0000369      | SNORA16A       | 19.5 | 7.3 | 2.7 | 1.4  | 3.8  | 0.4  |
| A_22_P0000788<br>8 | LINC00092      | 3.1  | 1.2 | 2.7 | 1.0  | 1.0  | 1.0  |
| A_24_P292470       | UCP3           | 2.7  | 1.0 | 2.7 | 1.0  | 1.0  | 1.0  |
| A_22_P0001132<br>5 | lnc-OST4-2     | 2.7  | 1.0 | 2.7 | 1.0  | 1.0  | 1.0  |
| A_33_P3452003      | LOC143286      | 3.6  | 1.4 | 2.7 | 1.8  | 1.9  | 0.9  |
| A_33_P3255434      | MEG3           | 3.1  | 1.2 | 2.6 | #N/A | #N/A | #N/A |
| A_22_P0000893<br>7 | C12orf80       | 2.6  | 1.0 | 2.6 | 1.0  | 1.0  | 1.0  |
| A_21_P0004128      | lnc-EMB-3      | 2.6  | 1.0 | 2.6 | 1.0  | #N/A | #N/A |
| A_33_P3241250      | LOC100132217   | 2.8  | 1.1 | 2.6 | 1.0  | 1.0  | 1.0  |
| A_23_P15357        | LGALS3BP       | 2.7  | 1.0 | 2.6 | 1.0  | 1.0  | 1.0  |
| A_33_P3376478      | CYP17A1        | 2.7  | 1.0 | 2.6 | #N/A | #N/A | #N/A |
| A_24_P51683        | CDK5R2         | 2.6  | 1.0 | 2.6 | 1.0  | 1.0  | 1.0  |
| A_24_P106542       | RSPO3          | 3.6  | 1.4 | 2.6 | 1.0  | 1.1  | 0.9  |
| A_21_P0006079      | LINC01506      | 2.9  | 1.1 | 2.6 | 1.0  | #N/A | #N/A |

|                |                  |      |     |     |      |      |      |
|----------------|------------------|------|-----|-----|------|------|------|
| A_22_P00002950 | lnc-C5orf47-2    | 2.6  | 1.0 | 2.6 | 1.0  | 1.0  | 1.0  |
| A_33_P3228739  | LRRC3C           | 2.6  | 1.0 | 2.6 | 1.0  | 1.0  | 1.0  |
| A_23_P17307    | MRGBP            | 2.6  | 1.0 | 2.6 | 2.3  | 2.2  | 1.1  |
| A_33_P3213419  | LOC100129447     | 2.6  | 1.0 | 2.6 | 1.0  | 1.0  | 1.0  |
| A_22_P00010493 | lnc-NBAS-1       | 4.3  | 1.7 | 2.6 | 1.0  | 1.0  | 1.0  |
| A_22_P00012128 | lnc-POLR1E-2     | 2.6  | 1.0 | 2.6 | 1.0  | 1.0  | 1.0  |
| A_23_P67896    | SCN3A            | 3.0  | 1.2 | 2.6 | #N/A | #N/A | #N/A |
| A_22_P00001270 | lnc-ANKRD53-1    | 2.9  | 1.1 | 2.6 | 1.0  | 1.0  | 1.0  |
| A_33_P3310976  | lnc-CDH4-1       | 2.6  | 1.0 | 2.6 | 1.0  | 1.0  | 1.0  |
| A_21_P0013089  | XLOC_I2_013056   | 2.6  | 1.0 | 2.6 | 1.0  | 1.0  | 1.0  |
| A_22_P00004142 | lnc-CLDN6-2      | 3.5  | 1.4 | 2.6 | 1.0  | 1.0  | 1.0  |
| A_21_P0000295  | SNORA67          | 11.8 | 4.6 | 2.6 | 1.8  | 3.3  | 0.5  |
| A_33_P3287379  | COG8             | 3.3  | 1.3 | 2.6 | 1.0  | 1.0  | 1.0  |
| A_21_P0011562  | XLOC_I2_005933   | 3.2  | 1.3 | 2.6 | 1.0  | 1.0  | 1.0  |
| A_21_P0012148  | XLOC_I2_008632   | 2.5  | 1.0 | 2.5 | 1.0  | 1.3  | 0.8  |
| A_19_P00315764 | LOC644277        | 2.7  | 1.1 | 2.5 | 1.0  | 1.0  | 1.0  |
| A_32_P52330    | LOC113230        | 2.8  | 1.1 | 2.5 | 1.0  | 1.0  | 1.0  |
| A_21_P0000331  | SNORA44          | 17.7 | 7.0 | 2.5 | #N/A | #N/A | #N/A |
| A_33_P3410821  | LOC100134360     | 3.8  | 1.5 | 2.5 | 1.0  | 1.0  | 1.0  |
| A_21_P0010382  | lnc-LARGE1-11    | 2.5  | 1.0 | 2.5 | #N/A | #N/A | #N/A |
| A_33_P3383696  | SPEG             | 6.9  | 2.7 | 2.5 | 13.8 | 12.4 | 1.1  |
| A_19_P00315843 | SCARNA16         | 5.7  | 2.2 | 2.5 | 4.1  | 6.4  | 0.6  |
| A_21_P0000347  | SNORA76C         | 3.0  | 1.2 | 2.5 | 1.0  | 1.0  | 1.0  |
| A_21_P0003242  | lnc-EPHA6-1      | 2.7  | 1.1 | 2.5 | 1.0  | 1.0  | 1.0  |
| A_22_P00019886 | HNF4A-AS1        | 2.5  | 1.0 | 2.5 | 1.0  | 1.0  | 1.0  |
| A_21_P0009382  | LINC01563        | 2.5  | 1.0 | 2.5 | 1.0  | 1.0  | 1.0  |
| A_21_P0000126  | TGFB3L           | 2.8  | 1.1 | 2.5 | 1.0  | 1.0  | 1.0  |
| A_33_P3247624  | REP15            | 11.6 | 4.6 | 2.5 | #N/A | #N/A | #N/A |
| A_21_P0000300  | SNORA48          | 7.4  | 2.9 | 2.5 | 1.0  | 1.6  | 0.6  |
| A_24_P255384   | RPL31P43         | 2.5  | 1.0 | 2.5 | 1.0  | 1.2  | 0.8  |
| A_21_P0008580  | LOC101929151     | 2.5  | 1.0 | 2.5 | 1.0  | 1.0  | 1.0  |
| A_22_P00023919 | lnc-MEGF10-1     | 2.9  | 1.2 | 2.5 | 1.0  | 1.0  | 1.0  |
| A_21_P0007948  | lnc-AL359392.1-2 | 2.9  | 1.2 | 2.5 | 1.2  | 2.2  | 0.5  |

|                    |                  |      |     |     |      |      |      |
|--------------------|------------------|------|-----|-----|------|------|------|
| A_21_P0000225      | SNORD83B         | 7.7  | 3.1 | 2.5 | 1.0  | 1.0  | 1.0  |
| A_23_P352535       | PPP1R16B         | 2.5  | 1.0 | 2.5 | 1.0  | 1.0  | 1.0  |
| A_22_P0000686<br>2 | TCEB3-AS1        | 3.0  | 1.2 | 2.5 | 1.0  | 1.0  | 1.0  |
| A_21_P0001708      | lnc-HMCN1-2      | 11.4 | 4.6 | 2.5 | 1.0  | 1.0  | 1.0  |
| A_23_P75790        | MYRF             | 2.6  | 1.0 | 2.5 | 1.0  | 1.0  | 1.0  |
| A_21_P0008072      | lnc-AL445989.1-2 | 2.7  | 1.1 | 2.5 | 1.0  | 1.0  | 1.0  |
| A_22_P0001648<br>3 | LOC148413        | 2.5  | 1.0 | 2.5 | 1.0  | 2.0  | 0.5  |
| A_32_P207124       | CT47A11          | 2.8  | 1.1 | 2.5 | 1.0  | 1.0  | 1.0  |
| A_33_P3258324      | LOC102724279     | 2.7  | 1.1 | 2.5 | 1.0  | 1.0  | 1.0  |
| A_33_P3358233      | NES              | 3.0  | 1.2 | 2.5 | 1.0  | 1.0  | 1.0  |
| A_33_P3306207      | KLRG2            | 2.8  | 1.1 | 2.5 | 1.0  | 1.0  | 1.0  |
| A_33_P3279124      | FAM21C           | 2.5  | 1.0 | 2.5 | 1.0  | 1.0  | 1.0  |
| A_19_P0031765<br>3 | LINC00969        | 2.5  | 1.0 | 2.5 | 1.0  | 1.0  | 1.0  |
| A_22_P0000064<br>3 | lnc-ACSM5-1      | 2.5  | 1.0 | 2.5 | #N/A | #N/A | #N/A |
| A_22_P0000042<br>7 | BOLA3-AS1        | 2.9  | 1.2 | 2.5 | 1.0  | 1.0  | 1.0  |
| A_19_P0032560<br>4 | LINC-ROR         | 2.5  | 1.0 | 2.5 | #N/A | #N/A | #N/A |
| A_33_P3350673      | HOPX             | 3.2  | 1.3 | 2.5 | #N/A | #N/A | #N/A |
| A_23_P48455        | AMN              | 2.5  | 1.0 | 2.5 | 1.0  | 1.0  | 1.0  |
| A_21_P0006850      | lnc-LYZL1-2      | 2.5  | 1.0 | 2.5 | 1.0  | #N/A | #N/A |
| A_23_P67952        | MYCNOS           | 2.5  | 1.0 | 2.5 | 1.0  | 1.0  | 1.0  |
| A_22_P0002300<br>6 | lnc-CHRNA6-1     | 2.5  | 1.0 | 2.5 | 1.0  | 1.0  | 1.0  |
| A_33_P3311717      | TGIF1            | 2.4  | 1.0 | 2.4 | 1.0  | 1.0  | 1.0  |
| A_33_P3258316      | XLOC_I2_013837   | 2.4  | 1.0 | 2.4 | 1.0  | 1.0  | 1.0  |
| A_22_P0000332<br>1 | lnc-CARHSP1-1    | 2.4  | 1.0 | 2.4 | 1.0  | 1.0  | 1.0  |
| A_33_P3287310      | TMEM273          | 2.4  | 1.0 | 2.4 | 1.0  | 1.0  | 1.0  |
| A_22_P0001705<br>6 | lnc-TUBB-7       | 2.4  | 1.0 | 2.4 | #N/A | #N/A | #N/A |
| A_22_P0001678<br>5 | LINC00967        | 2.9  | 1.2 | 2.4 | 1.0  | 1.0  | 1.0  |
| A_22_P0001389<br>7 | lnc-RPS21-2      | 3.1  | 1.3 | 2.4 | 1.0  | 1.0  | 1.0  |
| A_21_P0009788      | lnc-ZNF793-1     | 2.4  | 1.0 | 2.4 | 1.0  | 1.0  | 1.0  |
| A_33_P3380751      | ST8SIA1          | 2.4  | 1.0 | 2.4 | 1.4  | 2.2  | 0.6  |
| A_23_P47282        | ST14             | 2.4  | 1.0 | 2.4 | 1.0  | #N/A | #N/A |

|                    |                 |      |      |     |      |      |      |
|--------------------|-----------------|------|------|-----|------|------|------|
| A_21_P0002612      | lnc-GPR39-2     | 2.4  | 1.0  | 2.4 | 1.0  | #N/A | #N/A |
| A_22_P0000533<br>2 | lnc-DOLPP1-1    | 2.4  | 1.0  | 2.4 | 1.0  | 1.0  | 1.0  |
| A_21_P0000307      | SNORA2B         | 9.3  | 3.8  | 2.4 | 4.3  | 8.6  | 0.5  |
| A_33_P3239759      | PPAN-P2RY11     | 3.9  | 1.6  | 2.4 | 1.0  | 1.0  | 1.0  |
| A_21_P0013085      | XLOC_I2_013031  | 3.3  | 1.4  | 2.4 | 1.1  | 1.6  | 0.7  |
| A_22_P0001477<br>1 | lnc-SLC36A4-1   | 3.1  | 1.3  | 2.4 | 1.0  | 1.0  | 1.0  |
| A_21_P0002398      | lnc-KIDINS220-6 | 3.2  | 1.3  | 2.4 | 1.0  | 1.0  | 1.0  |
| A_21_P0012616      | XLOC_I2_010854  | 2.6  | 1.1  | 2.4 | 1.0  | 1.0  | 1.0  |
| A_23_P254212       | RPA4            | 7.0  | 2.9  | 2.4 | 1.0  | 1.0  | 1.0  |
| A_33_P3239102      | GOLGA6L10       | 4.4  | 1.8  | 2.4 | 1.2  | 1.7  | 0.7  |
| A_33_P3350202      | MOCS3           | 2.4  | 1.0  | 2.4 | 1.0  | 1.0  | 1.0  |
| A_33_P3323019      | LOC729856       | 2.6  | 1.1  | 2.4 | 1.0  | 1.0  | 1.0  |
| A_33_P3344991      | TBC1D3L         | 2.7  | 1.1  | 2.4 | 1.0  | 1.0  | 1.0  |
| A_22_P0001280<br>7 | lnc-RAP1GDS1-3  | 2.4  | 1.0  | 2.4 | 1.0  | #N/A | #N/A |
| A_23_P373031       | CACNA1C         | 2.4  | 1.0  | 2.4 | 1.0  | 1.0  | 1.0  |
| A_22_P0001427<br>0 | MFI2-AS1        | 3.6  | 1.5  | 2.4 | 1.0  | 1.0  | 1.0  |
| A_33_P3329462      | DLEU1-AS1       | 3.1  | 1.3  | 2.4 | 1.0  | #N/A | #N/A |
| A_33_P3284715      | SCARNA7         | 4.4  | 1.9  | 2.4 | 1.0  | 1.0  | 1.0  |
| A_21_P0004750      | lnc-SUPT3H-1    | 9.5  | 4.0  | 2.4 | 1.0  | 1.0  | 1.0  |
| A_23_P89155        | CDK3            | 3.9  | 1.6  | 2.4 | 1.0  | 1.7  | 0.6  |
| A_33_P3285868      | CYGB            | 2.4  | 1.0  | 2.4 | 1.0  | 1.0  | 1.0  |
| A_22_P0001152<br>0 | lnc-PAXIP1-1    | 2.9  | 1.2  | 2.4 | 1.0  | 1.0  | 1.0  |
| A_33_P3247403      | TOR3A           | 2.4  | 1.0  | 2.4 | 1.0  | 1.0  | 1.0  |
| A_33_P3221960      | IL18RAP         | 3.0  | 1.3  | 2.4 | 1.0  | 2.0  | 0.5  |
| A_33_P3293913      | BICC1           | 8.2  | 3.5  | 2.4 | #N/A | #N/A | #N/A |
| A_22_P0002446<br>8 | lnc-CTNNA2-1    | 3.2  | 1.3  | 2.4 | 1.0  | 1.0  | 1.0  |
| A_33_P3335371      | MAML3           | 2.4  | 1.0  | 2.4 | 1.0  | 1.0  | 1.0  |
| A_24_P368943       | EVX1            | 2.4  | 1.0  | 2.4 | 1.0  | 1.0  | 1.0  |
| A_21_P0000299      | SNORA19         | 24.9 | 10.5 | 2.4 | 11.3 | 17.7 | 0.6  |
| A_21_P0003216      | LOC101927440    | 4.1  | 1.7  | 2.4 | 1.0  | #N/A | #N/A |
| A_21_P0000236      | SNORA64         | 8.8  | 3.7  | 2.4 | 2.8  | 3.8  | 0.7  |
| A_33_P3308153      | MTM1            | 2.4  | 1.0  | 2.4 | 1.0  | 1.0  | 1.0  |
| A_33_P3267482      | KIAA1804        | 3.2  | 1.4  | 2.4 | 1.0  | 1.0  | 1.0  |
| A_24_P280497       | FBRSL1          | 2.4  | 1.0  | 2.4 | 1.0  | 1.0  | 1.0  |
| A_33_P3343981      | AATK            | 3.1  | 1.3  | 2.3 | 1.0  | 1.0  | 1.0  |
| A_33_P3401284      | RMRP            | 4.1  | 1.8  | 2.3 | 1.0  | 1.0  | 1.0  |

|                |                       |      |     |     |      |      |      |
|----------------|-----------------------|------|-----|-----|------|------|------|
| A_21_P0000479  | SNORA11D              | 14.7 | 6.3 | 2.3 | 4.5  | 7.2  | 0.6  |
| A_33_P3381292  | lnc-FGF3-3            | 2.3  | 1.0 | 2.3 | 1.0  | 1.0  | 1.0  |
| A_24_P18802    | VPS18                 | 7.4  | 3.1 | 2.3 | 1.0  | 1.0  | 1.0  |
| A_21_P0004883  | lnc-UBR2-1            | 2.3  | 1.0 | 2.3 | 1.0  | 1.0  | 1.0  |
| A_21_P0000218  | SNORD35A              | 3.5  | 1.5 | 2.3 | #N/A | #N/A | #N/A |
| A_21_P0000309  | SNORA11               | 5.2  | 2.2 | 2.3 | 2.9  | 4.6  | 0.6  |
| A_22_P00006278 | lnc-FAM76A-1          | 3.0  | 1.3 | 2.3 | 1.0  | 1.0  | 1.0  |
| A_33_P3406828  | MAFIP                 | 2.4  | 1.0 | 2.3 | 1.0  | 1.0  | 1.0  |
| A_23_P157465   | UBXN8                 | 2.6  | 1.1 | 2.3 | 2.0  | 1.3  | 1.5  |
| A_33_P3275722  | LY6G6D                | 2.4  | 1.0 | 2.3 | 1.0  | 1.0  | 1.0  |
| A_22_P00014899 | lnc-SLC9A1-1          | 2.3  | 1.0 | 2.3 | 1.0  | 1.0  | 1.0  |
| A_21_P0011595  | XLOC_I2_006101        | 5.7  | 2.4 | 2.3 | 1.0  | #N/A | #N/A |
| A_33_P3318946  | HAPLN2                | 2.9  | 1.3 | 2.3 | 1.0  | 1.0  | 1.0  |
| A_21_P0000258  | SNORD26               | 7.3  | 3.1 | 2.3 | 1.0  | 1.0  | 1.0  |
| A_22_P00020414 | lnc-TTC7B-2           | 2.7  | 1.2 | 2.3 | 1.0  | #N/A | #N/A |
| A_33_P3287113  | UVSSA                 | 2.3  | 1.0 | 2.3 | 1.0  | 1.0  | 1.0  |
| A_22_P00000419 | TM4SF19-AS1           | 2.3  | 1.0 | 2.3 | 1.0  | 1.0  | 1.0  |
| A_33_P3365666  | DTX2                  | 2.5  | 1.1 | 2.3 | 1.0  | 1.0  | 1.0  |
| A_33_P3278826  | LTK                   | 3.4  | 1.5 | 2.3 | 1.0  | 1.0  | 1.0  |
| A_21_P0000593  | SNORA70D              | 2.9  | 1.3 | 2.3 | #N/A | #N/A | #N/A |
| A_22_P00017762 | CCNT2-AS1             | 9.7  | 4.2 | 2.3 | 1.0  | 1.0  | 1.0  |
| A_22_P00016775 | TRIM52-AS1            | 2.6  | 1.1 | 2.3 | 1.0  | 1.0  | 1.0  |
| A_21_P0014853  | GS1-24F4.2            | 2.3  | 1.0 | 2.3 | 1.0  | 1.0  | 1.0  |
| A_21_P0000348  | SNORA80A              | 4.7  | 2.0 | 2.3 | 1.0  | 1.0  | 1.0  |
| A_33_P3239143  | ZNF497                | 2.3  | 1.0 | 2.3 | 1.0  | 1.0  | 1.0  |
| A_22_P00024619 | lnc-RP11-503N18.3.1-3 | 2.4  | 1.0 | 2.3 | 1.0  | 1.0  | 1.0  |
| A_33_P3234540  | ABCA17P               | 2.3  | 1.0 | 2.3 | 1.0  | 1.0  | 1.0  |
| A_22_P00012570 | lnc-PTP4A2-1          | 2.3  | 1.0 | 2.3 | 1.0  | 1.0  | 1.0  |
| A_22_P00006290 | RAD51-AS1             | 2.9  | 1.3 | 2.3 | 1.0  | 1.0  | 1.0  |
| A_33_P3305105  | VWA5A                 | 2.4  | 1.0 | 2.3 | 1.0  | #N/A | #N/A |
| A_19_P00808072 | lnc-RTL1-2            | 2.4  | 1.0 | 2.3 | 1.0  | 1.0  | 1.0  |
| A_33_P3474250  | TRIM44                | 2.3  | 1.0 | 2.3 | 1.0  | 1.7  | 0.6  |

|                |                |      |     |     |      |      |      |
|----------------|----------------|------|-----|-----|------|------|------|
| A_21_P0013166  | FOXL3          | 2.3  | 1.0 | 2.3 | 1.0  | 1.0  | 1.0  |
| A_33_P3359354  | C1orf86        | 2.5  | 1.1 | 2.3 | 1.0  | 1.0  | 1.0  |
| A_33_P3396459  | POLR2H         | 2.3  | 1.0 | 2.3 | 1.0  | 1.0  | 1.0  |
| A_22_P00001924 | lnc-BAI3-3     | 2.4  | 1.1 | 2.3 | 1.0  | 1.0  | 1.0  |
| A_24_P229871   | LINC00469      | 2.3  | 1.0 | 2.3 | 2.8  | 4.1  | 0.7  |
| A_21_P0000303  | SNORA75        | 3.1  | 1.4 | 2.3 | #N/A | #N/A | #N/A |
| A_21_P0000341  | SNORA61        | 5.3  | 2.3 | 2.3 | 1.0  | 1.4  | 0.7  |
| A_21_P0000474  | SNORA38B       | 9.8  | 4.3 | 2.3 | #N/A | #N/A | #N/A |
| A_33_P3798739  | LOC286382      | 2.3  | 1.0 | 2.3 | 1.0  | 1.0  | 1.0  |
| A_21_P0000342  | SNORA5B        | 7.2  | 3.2 | 2.3 | 3.0  | 2.1  | 1.5  |
| A_33_P3412556  | PPIAP28        | 2.3  | 1.0 | 2.3 | 1.0  | #N/A | #N/A |
| A_21_P0007321  | lnc-SOX6-1     | 9.4  | 4.2 | 2.3 | 1.0  | 1.0  | 1.0  |
| A_33_P3303519  | CLEC12B        | 3.0  | 1.3 | 2.3 | 1.1  | 2.3  | 0.5  |
| A_22_P00014685 | lnc-SLC25A21-1 | 2.6  | 1.1 | 2.3 | 1.0  | 1.0  | 1.0  |
| A_33_P3338360  | SCARNA13       | 5.2  | 2.3 | 2.3 | 3.1  | 2.9  | 1.0  |
| A_23_P325726   | ACOT11         | 2.8  | 1.2 | 2.3 | 1.0  | #N/A | #N/A |
| A_22_P00007594 | lnc-HDDC3-1    | 2.3  | 1.0 | 2.3 | 1.0  | 1.0  | 1.0  |
| A_33_P3393537  | PTAFR          | 2.4  | 1.0 | 2.3 | 1.0  | 1.0  | 1.0  |
| A_19_P00315581 | LINC01122      | 4.2  | 1.9 | 2.3 | 1.2  | 1.5  | 0.8  |
| A_21_P0004987  | lnc-GMDS-4     | 2.3  | 1.0 | 2.3 | 1.0  | 1.0  | 1.0  |
| A_33_P3297468  | SLC34A3        | 2.2  | 1.0 | 2.2 | 1.0  | 1.0  | 1.0  |
| A_21_P0009377  | lnc-NLGN2-1    | 2.2  | 1.0 | 2.2 | 1.0  | 1.0  | 1.0  |
| A_21_P0002976  | lnc-GPR27-2    | 2.8  | 1.2 | 2.2 | 1.0  | 1.0  | 1.0  |
| A_22_P00010068 | LOC101927204   | 2.2  | 1.0 | 2.2 | 1.0  | 1.0  | 1.0  |
| A_33_P3338152  | HIF3A          | 2.2  | 1.0 | 2.2 | 1.0  | 1.0  | 1.0  |
| A_22_P00015927 | lnc-TCL1B-2    | 10.0 | 4.5 | 2.2 | 1.0  | 1.0  | 1.0  |
| A_22_P00023975 | PAQR9-AS1      | 3.2  | 1.4 | 2.2 | 1.0  | 1.0  | 1.0  |
| A_33_P3229288  | ACE            | 2.2  | 1.0 | 2.2 | 1.0  | 1.1  | 0.9  |
| A_22_P00003762 | lnc-CDIPT-2    | 2.2  | 1.0 | 2.2 | 1.0  | 1.0  | 1.0  |
| A_33_P3335682  | PPP1R14A       | 2.2  | 1.0 | 2.2 | 1.0  | 1.0  | 1.0  |
| A_23_P164341   | VAMP2          | 2.5  | 1.1 | 2.2 | 1.0  | 1.0  | 1.0  |
| A_22_P00011225 | lnc-OPRL1-1    | 2.4  | 1.1 | 2.2 | 1.0  | 1.0  | 1.0  |

|                    |                |      |      |     |      |      |      |
|--------------------|----------------|------|------|-----|------|------|------|
| A_22_P0001170<br>4 | lnc-PDZD7-1    | 2.4  | 1.1  | 2.2 | 1.0  | 1.0  | 1.0  |
| A_22_P0001519<br>5 | LOC100996842   | 2.3  | 1.0  | 2.2 | 1.0  | 1.0  | 1.0  |
| A_33_P3308456      | PRAC2          | 2.5  | 1.1  | 2.2 | 1.0  | 1.0  | 1.0  |
| A_19_P0031937<br>2 | LINC00969      | 2.7  | 1.2  | 2.2 | 1.0  | 1.0  | 1.0  |
| A_33_P3306327      | CELF5          | 3.8  | 1.7  | 2.2 | 1.2  | 1.8  | 0.7  |
| A_23_P111311       | AKAP12         | 2.9  | 1.3  | 2.2 | #N/A | #N/A | #N/A |
| A_33_P3309365      | SLC25A3P1      | 2.5  | 1.1  | 2.2 | 1.0  | 1.0  | 1.0  |
| A_22_P0001975<br>7 | VDAC1P8        | 2.6  | 1.2  | 2.2 | 1.0  | 1.1  | 0.9  |
| A_33_P3280950      | A2M-AS1        | 2.2  | 1.0  | 2.2 | 1.0  | 1.0  | 1.0  |
| A_23_P163711       | FAM57B         | 3.0  | 1.4  | 2.2 | 1.0  | 1.0  | 1.0  |
| A_33_P3359683      | IL16           | 2.5  | 1.2  | 2.2 | 1.0  | 1.0  | 1.0  |
| A_21_P0013931      | THC2673826     | 2.2  | 1.0  | 2.2 | #N/A | #N/A | #N/A |
| A_33_P3227217      | SNORA81        | 27.0 | 12.3 | 2.2 | 27.6 | 44.4 | 0.6  |
| A_33_P3374365      | LOC100129702   | 2.2  | 1.0  | 2.2 | 1.0  | 1.0  | 1.0  |
| A_33_P3365932      | WASH1          | 2.2  | 1.0  | 2.2 | 1.0  | 1.0  | 1.0  |
| A_23_P131060       | CYP4F8         | 2.2  | 1.0  | 2.2 | 1.0  | 1.0  | 1.0  |
| A_33_P7618758      | LINC01541      | 6.8  | 3.1  | 2.2 | 2.2  | 1.9  | 1.2  |
| A_21_P0000592      | SNORA70G       | 3.3  | 1.5  | 2.2 | 1.4  | 1.6  | 0.8  |
| A_21_P0005689      | LOC101929622   | 2.4  | 1.1  | 2.2 | 1.0  | 1.1  | 0.9  |
| A_33_P3225298      | XKR9           | 2.2  | 1.0  | 2.2 | 1.0  | 1.0  | 1.0  |
| A_22_P0000311<br>0 | lnc-C9orf103-1 | 2.2  | 1.0  | 2.2 | 1.0  | 1.0  | 1.0  |
| A_22_P0001811<br>2 | LOC102724231   | 2.2  | 1.0  | 2.2 | 1.0  | 1.0  | 1.0  |
| A_21_P0006395      | lnc-PTGES2-1   | 2.2  | 1.0  | 2.2 | 1.0  | 1.0  | 1.0  |
| A_24_P932736       | HMBBOX1        | 11.5 | 5.3  | 2.2 | 1.0  | 1.0  | 1.0  |
| A_33_P3383226      | GP9            | 2.2  | 1.0  | 2.2 | #N/A | #N/A | #N/A |
| A_23_P424734       | EXOC3L1        | 2.4  | 1.1  | 2.1 | #N/A | #N/A | #N/A |
| A_19_P0032138<br>8 | LINC00511      | 2.2  | 1.0  | 2.1 | 1.0  | 1.0  | 1.0  |
| A_33_P3312754      | LOC102467146   | 2.1  | 1.0  | 2.1 | 1.0  | 1.0  | 1.0  |
| A_33_P3303176      | MARGPRG        | 3.1  | 1.4  | 2.1 | 1.0  | 1.0  | 1.0  |
| A_21_P0000220      | SNORD33        | 4.9  | 2.3  | 2.1 | 1.4  | 2.4  | 0.6  |
| A_21_P0000397      | SCARNA18       | 2.6  | 1.2  | 2.1 | 2.5  | 2.7  | 0.9  |
| A_24_P359191       | SLC6A6         | 2.1  | 1.0  | 2.1 | 1.0  | 1.0  | 1.0  |
| A_23_P313031       | LOC101930506   | 2.4  | 1.1  | 2.1 | 1.0  | 1.0  | 1.0  |
| A_21_P0012294      | GGTLC4P        | 2.1  | 1.0  | 2.1 | 1.0  | 1.0  | 1.0  |
| A_21_P0000394      | SNORD110       | 6.9  | 3.3  | 2.1 | 1.2  | #N/A | #N/A |

|                |                |      |     |     |      |      |      |
|----------------|----------------|------|-----|-----|------|------|------|
| A_22_P00003569 | SNHG18         | 2.4  | 1.1 | 2.1 | 1.0  | 1.0  | 1.0  |
| A_23_P155463   | LRRC2          | 9.8  | 4.6 | 2.1 | 1.0  | #N/A | #N/A |
| A_22_P00004304 | lnc-CNTLN-2    | 2.2  | 1.0 | 2.1 | 1.0  | 1.0  | 1.0  |
| A_33_P3354771  | MEF2BNB        | 2.3  | 1.1 | 2.1 | 1.0  | 1.0  | 1.0  |
| A_23_P219197   | RGS3           | 2.1  | 1.0 | 2.1 | 3.0  | 3.3  | 0.9  |
| A_33_P3359308  | KLHL29         | 2.6  | 1.3 | 2.1 | 1.0  | 1.0  | 1.0  |
| A_21_P0000257  | SNORD27        | 10.2 | 4.8 | 2.1 | 1.0  | 1.0  | 1.0  |
| A_24_P88079    | MUC6           | 2.1  | 1.0 | 2.1 | 1.0  | 1.0  | 1.0  |
| A_21_P0010415  | lnc-APOL1-1    | 2.7  | 1.3 | 2.1 | 1.0  | 1.0  | 1.0  |
| A_33_P3399468  | LOC100133182   | 2.1  | 1.0 | 2.1 | 1.0  | 1.0  | 1.0  |
| A_22_P00002236 | KCNMA1-AS1     | 8.7  | 4.1 | 2.1 | #N/A | #N/A | #N/A |
| A_33_P3248272  | UBXN8          | 2.7  | 1.3 | 2.1 | 1.7  | 1.3  | 1.3  |
| A_33_P3411080  | FSCN2          | 2.1  | 1.0 | 2.1 | 1.0  | 1.0  | 1.0  |
| A_22_P00013961 | lnc-RTL1-2     | 2.3  | 1.1 | 2.1 | 1.0  | 1.0  | 1.0  |
| A_21_P0012105  | CRYGEP         | 2.6  | 1.2 | 2.1 | 1.0  | 1.0  | 1.0  |
| A_33_P3400429  | UBE3A          | 2.2  | 1.1 | 2.1 | 1.8  | 1.4  | 1.3  |
| A_22_P00007112 | lnc-GLUD1-3    | 2.1  | 1.0 | 2.1 | 1.0  | 1.0  | 1.0  |
| A_32_P98732    | GCM1           | 2.1  | 1.0 | 2.1 | #N/A | #N/A | #N/A |
| A_22_P00002900 | CTBP1-AS2      | 2.1  | 1.0 | 2.1 | 1.0  | 1.0  | 1.0  |
| A_24_P396327   | TYW3           | 2.5  | 1.2 | 2.1 | 1.2  | 1.7  | 0.7  |
| A_32_P145153   | RPL31          | 2.1  | 1.0 | 2.1 | 1.2  | 1.0  | 1.2  |
| A_33_P3300635  | PFKFB2         | 2.1  | 1.0 | 2.1 | 1.0  | 1.0  | 1.0  |
| A_22_P00005789 | lnc-EPB41-2    | 2.1  | 1.0 | 2.1 | 1.0  | 1.0  | 1.0  |
| A_33_P3306192  | KBTBD13        | 2.1  | 1.0 | 2.1 | 1.0  | 1.0  | 1.0  |
| A_22_P00015513 | LOC101929294   | 2.1  | 1.0 | 2.1 | 1.3  | 1.2  | 1.1  |
| A_21_P0000591  | SNORA70F       | 2.7  | 1.3 | 2.1 | #N/A | #N/A | #N/A |
| A_21_P0014334  | LOC101928557   | 2.4  | 1.1 | 2.1 | 1.0  | 1.0  | 1.0  |
| A_22_P00003512 | lnc-CCL1-1     | 2.6  | 1.3 | 2.0 | 1.0  | 1.0  | 1.0  |
| A_24_P131589   | CD86           | 8.0  | 3.9 | 2.0 | 1.0  | 1.0  | 1.0  |
| A_33_P3301689  | ZNF326         | 2.0  | 1.0 | 2.0 | 1.0  | 1.0  | 1.0  |
| A_21_P0007619  | LINC02385      | 2.0  | 1.0 | 2.0 | 1.0  | 1.0  | 1.0  |
| A_33_P3292130  | XLOC_I2_013383 | 2.0  | 1.0 | 2.0 | 1.0  | 1.0  | 1.0  |
| A_21_P0000363  | SNORA25        | 7.1  | 3.5 | 2.0 | 16.0 | 19.7 | 0.8  |

|                    |              |      |      |      |      |      |      |
|--------------------|--------------|------|------|------|------|------|------|
| A_22_P0002499<br>3 | LOC102724231 | 2.0  | 1.0  | 2.0  | 1.0  | 1.0  | 1.0  |
| A_22_P0000947<br>3 | PSMG3-AS1    | 2.0  | 1.0  | 2.0  | 1.0  | 1.0  | 1.0  |
| A_21_P0009324      | lnc-CCR7-1   | 2.5  | 1.2  | 2.0  | 1.0  | 1.0  | 1.0  |
| A_23_P107801       | C19orf44     | 2.2  | 1.1  | 2.0  | 1.0  | 1.0  | 1.0  |
| A_22_P0001394<br>1 | lnc-RRP8-1   | 2.3  | 1.1  | 2.0  | 1.0  | 1.0  | 1.0  |
| A_23_P389987       | TLX2         | 4.7  | 2.3  | 2.0  | 1.0  | 1.0  | 1.0  |
| A_21_P0002061      | LOC101927577 | 2.9  | 1.4  | 2.0  | 1.0  | 1.0  | 1.0  |
| A_21_P0000270      | SNORA63      | 4.6  | 2.3  | 2.0  | 1.7  | 2.8  | 0.6  |
| A_24_P120934       | GADD45G      | 3.0  | 1.5  | 2.0  | 1.0  | 1.0  | 1.0  |
| A_21_P0001923      | LINC01911    | 9.3  | 4.6  | 2.0  | 1.0  | 1.0  | 1.0  |
| A_21_P0000301      | SNORA5A      | 7.3  | 3.6  | 2.0  | 1.9  | 1.8  | 1.1  |
| A_33_P3241741      | SNORA23      | 3.7  | 1.8  | 2.0  | 3.8  | 4.0  | 1.0  |
| A_33_P3393091      | DA197111     | 2.0  | 1.0  | 2.0  | #N/A | #N/A | #N/A |
| A_22_P0000957<br>4 | LOC100506113 | 2.3  | 1.2  | 2.0  | 1.0  | 1.0  | 1.0  |
| A_22_P0000022<br>2 | LOC100506585 | 2.0  | 1.0  | 2.0  | 1.0  | 1.0  | 1.0  |
| A_33_P3367171      | SLC22A8      | 2.1  | 1.0  | 2.0  | 1.0  | 1.0  | 1.0  |
| A_33_P3410849      | C8orf58      | 2.0  | 1.0  | 2.0  | 1.0  | 1.0  | 1.0  |
| A_33_P3219811      | PTGDS        | 2.2  | 1.1  | 2.0  | 1.0  | 1.0  | 1.0  |
| A_22_P0001781<br>5 | LINC00638    | 2.5  | 1.2  | 2.0  | 1.0  | 1.0  | 1.0  |
| A_24_P206344       | ZNF746       | 2.0  | 1.0  | 2.0  | 1.0  | 1.0  | 1.0  |
| A_21_P0000251      | SNORA65      | 6.2  | 3.1  | 2.0  | 4.2  | 4.6  | 0.9  |
| A_21_P0009735      | LOC102723811 | 3.3  | 1.6  | 2.0  | #N/A | #N/A | #N/A |
| A_23_P94009        | LSM8         | 2.2  | 1.1  | 2.0  | 3.2  | 2.1  | 1.5  |
| A_21_P0007070      | lnc-RPP30-2  | 9.4  | 4.7  | 2.0  | 1.0  | 1.0  | 1.0  |
| A_23_P53467        | IKBIP        | 1.1  | 1.0  | 1.1  | 4.0  | 1.0  | 4.0  |
| A_24_P370670       | ZMYM6NB      | 1.9  | 3.2  | 0.6  | 3.2  | 1.0  | 3.2  |
| A_22_P0001699<br>8 | DSCR9        | 4.0  | 7.4  | 0.5  | 6.1  | 2.1  | 3.0  |
| A_23_P25121        | FKBP11       | 6.3  | 10.3 | 0.6  | 8.2  | 2.8  | 2.9  |
| A_33_P3267296      | FKBP11       | 5.8  | 10.0 | 0.6  | 6.9  | 2.4  | 2.9  |
| A_24_P52697        | H19          | 24.1 | 37.0 | 0.7  | 3.0  | 1.0  | 2.9  |
| A_23_P41664        | LRRC70       | #N/A | #N/A | #N/A | 2.9  | 1.0  | 2.8  |
| A_24_P931443       | GPR68        | 1.0  | 1.0  | 1.0  | 3.4  | 1.2  | 2.8  |
| A_24_P166613       | EPDR1        | 1.0  | 1.3  | 0.8  | 2.8  | 1.0  | 2.8  |
| A_33_P3352827      | SLAMF1       | #N/A | #N/A | #N/A | 3.9  | 1.4  | 2.7  |
| A_23_P28318        | NDUFAF7      | 1.5  | 1.0  | 1.5  | 2.6  | 1.0  | 2.6  |

|                    |                |      |      |      |      |     |     |
|--------------------|----------------|------|------|------|------|-----|-----|
| A_23_P86283        | LAPTM5         | 1.0  | 1.3  | 0.8  | 2.6  | 1.0 | 2.6 |
| A_24_P343271       | RMND1          | 1.2  | 1.0  | 1.2  | 2.5  | 1.0 | 2.5 |
| A_24_P393565       | ZNF396         | #N/A | #N/A | #N/A | 2.5  | 1.0 | 2.5 |
| A_33_P3412160      | CLCC1          | 1.0  | 1.0  | 1.0  | 2.6  | 1.0 | 2.5 |
| A_23_P17287        | IAH1           | 1.0  | 1.0  | 1.0  | 3.8  | 1.5 | 2.5 |
| A_19_P0031941<br>3 | Inc-NRG1-2     | 1.3  | 3.0  | 0.4  | 4.7  | 1.9 | 2.5 |
| A_23_P136504       | SLC25A21       | 1.0  | 1.0  | 1.0  | 5.2  | 2.1 | 2.5 |
| A_23_P114232       | PRDX4          | 3.1  | 1.8  | 1.7  | 8.9  | 3.6 | 2.5 |
| A_23_P77415        | OSGIN1         | 1.9  | 1.3  | 1.5  | 3.4  | 1.4 | 2.4 |
| A_24_P810290       | PPAPDC1A       | 1.0  | 1.7  | 0.6  | 2.4  | 1.0 | 2.4 |
| A_33_P3262789      | REEP6          | 1.0  | 1.0  | 1.0  | 2.5  | 1.0 | 2.4 |
| A_33_P3330811      | C8orf59        | 1.0  | 1.0  | 1.0  | 2.5  | 1.1 | 2.4 |
| A_23_P68472        | DPM1           | 1.0  | 1.0  | 1.0  | 3.8  | 1.6 | 2.4 |
| A_21_P0011758      | XLOC_I2_007097 | 2.0  | 4.7  | 0.4  | 2.8  | 1.2 | 2.4 |
| A_23_P98350        | BIRC3          | 1.1  | 2.3  | 0.5  | 2.3  | 1.0 | 2.3 |
| A_21_P0006091      | XLOC_007776    | 1.2  | 1.5  | 0.8  | 2.3  | 1.0 | 2.3 |
| A_24_P317762       | LY6E           | 1.0  | 1.2  | 0.8  | 2.3  | 1.0 | 2.3 |
| A_21_P0002904      | LINC01326      | 1.1  | 2.4  | 0.5  | 2.3  | 1.0 | 2.3 |
| A_21_P0007787      | LINC00944      | 1.8  | 2.0  | 0.9  | 3.6  | 1.6 | 2.3 |
| A_33_P3295523      | RAC3           | 1.5  | 1.3  | 1.1  | 2.3  | 1.0 | 2.3 |
| A_32_P14762        | OOEP           | 1.1  | 1.6  | 0.7  | 3.6  | 1.6 | 2.3 |
| A_23_P53856        | N4BP2L2        | 2.2  | 1.2  | 1.9  | 3.1  | 1.4 | 2.3 |
| A_21_P0007481      | LINC00944      | 2.5  | 2.4  | 1.1  | 3.8  | 1.7 | 2.2 |
| A_24_P389916       | LRRC32         | 4.7  | 6.2  | 0.7  | 3.4  | 1.5 | 2.2 |
| A_23_P98252        | ARL2           | 3.7  | 6.4  | 0.6  | 14.6 | 6.6 | 2.2 |
| A_22_P0000513<br>2 | LINC00944      | 1.6  | 2.1  | 0.8  | 3.5  | 1.6 | 2.2 |
| A_23_P385217       | ARL8B          | 1.0  | 1.0  | 1.0  | 2.7  | 1.2 | 2.2 |
| A_33_P3255229      | SETD7          | 1.0  | 1.0  | 1.0  | 2.2  | 1.0 | 2.2 |
| A_23_P251499       | PCOLCE         | 1.0  | 1.0  | 1.0  | 2.2  | 1.0 | 2.2 |
| A_24_P16913        | ABCC4          | 1.0  | 1.3  | 0.8  | 7.9  | 3.7 | 2.2 |
| A_21_P0010896      | LINC00864      | 1.0  | 1.0  | 1.0  | 4.2  | 2.0 | 2.1 |
| A_21_P0012475      | XLOC_I2_010489 | 3.5  | 7.9  | 0.4  | 3.2  | 1.5 | 2.1 |
| A_23_P380318       | EGR4           | 1.5  | 1.3  | 1.2  | 2.7  | 1.3 | 2.1 |
| A_23_P107693       | ZNF586         | #N/A | #N/A | #N/A | 2.4  | 1.2 | 2.1 |
| A_21_P0007789      | LINC00944      | #N/A | #N/A | #N/A | 3.9  | 1.9 | 2.1 |
| A_23_P396867       | HM13           | 1.0  | 1.0  | 1.0  | 2.1  | 1.0 | 2.1 |
| A_22_P0001861<br>7 | LOC101927027   | 1.0  | 1.3  | 0.8  | 2.4  | 1.2 | 2.0 |
| A_23_P162355       | HOXC5          | 3.6  | 5.2  | 0.7  | 3.6  | 1.8 | 2.0 |
| A_33_P3294449      | DCAF6          | #N/A | #N/A | #N/A | 2.6  | 1.3 | 2.0 |

|                    |             |     |     |     |     |     |     |
|--------------------|-------------|-----|-----|-----|-----|-----|-----|
| A_23_P131653       | PIGF        | 1.1 | 1.0 | 1.1 | 3.8 | 1.9 | 2.0 |
| A_22_P0001685<br>8 | Inc-TRPT1-1 | 1.7 | 2.1 | 0.8 | 2.5 | 1.2 | 2.0 |
| A_33_P3370832      | FAM117B     | 1.0 | 1.0 | 1.0 | 2.1 | 1.1 | 2.0 |
