# Supplementary figures and images for: The Role of the MYC/miR-150/MYB/ZDHHC11 Network in Hodgkin Lymphoma and Diffuse Large B-Cell Lymphoma
Source: MDPI journal article supplement (doi:10.3390/genes13020227), 2022-01-25

A

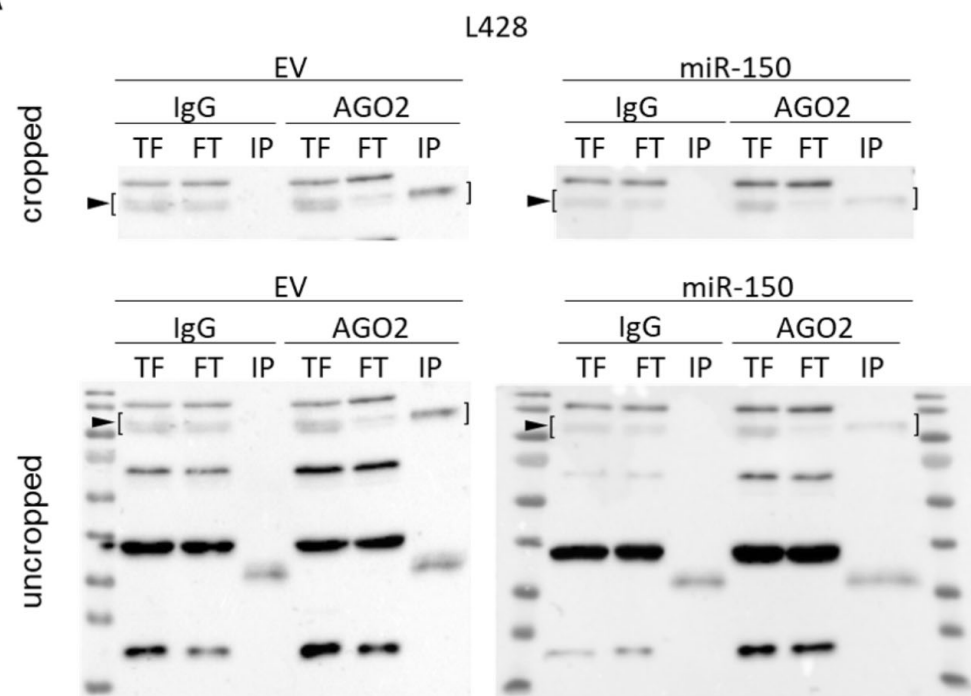

B

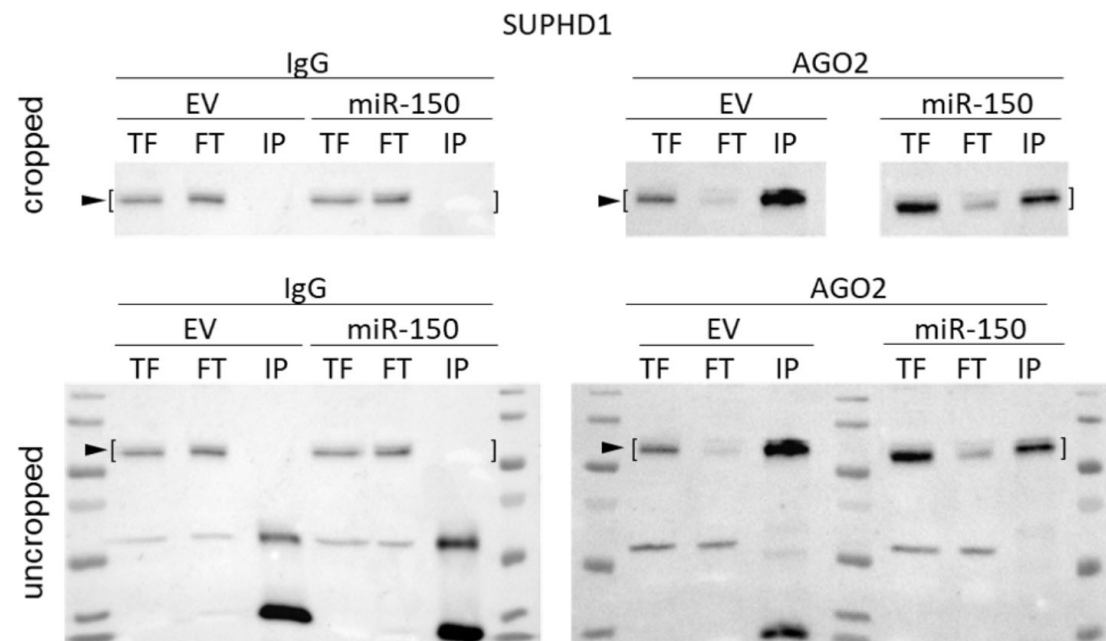

C

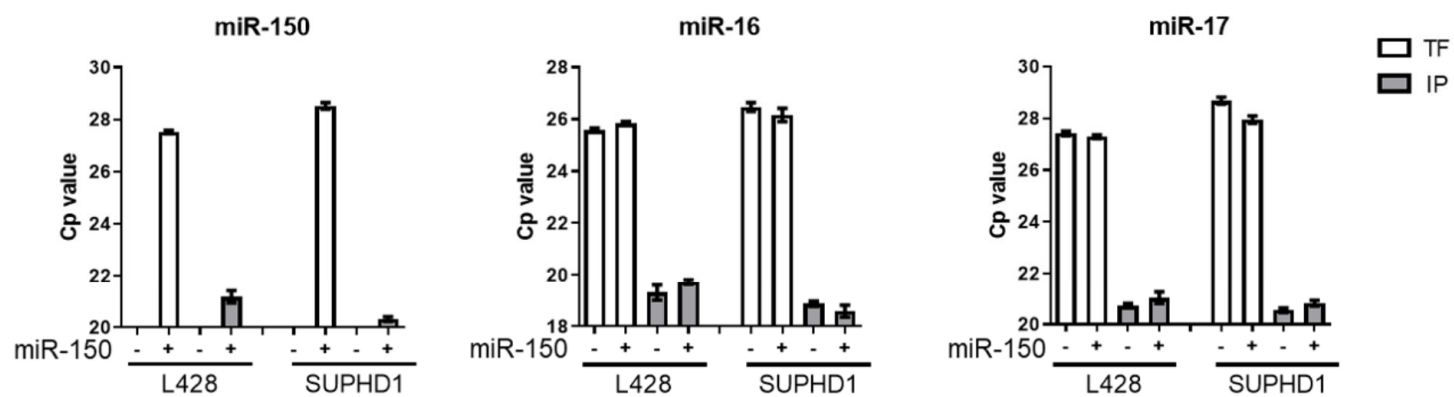

Supplement: s1 [file s1]

A

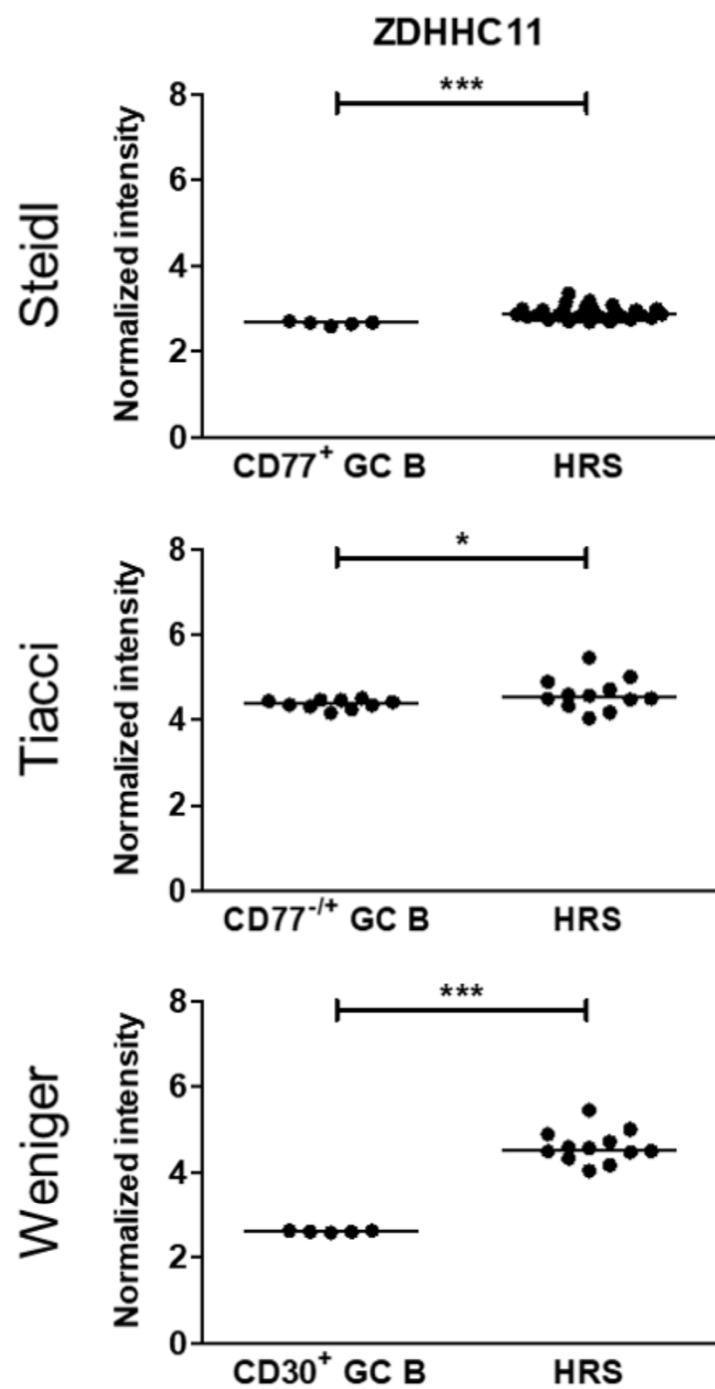

B

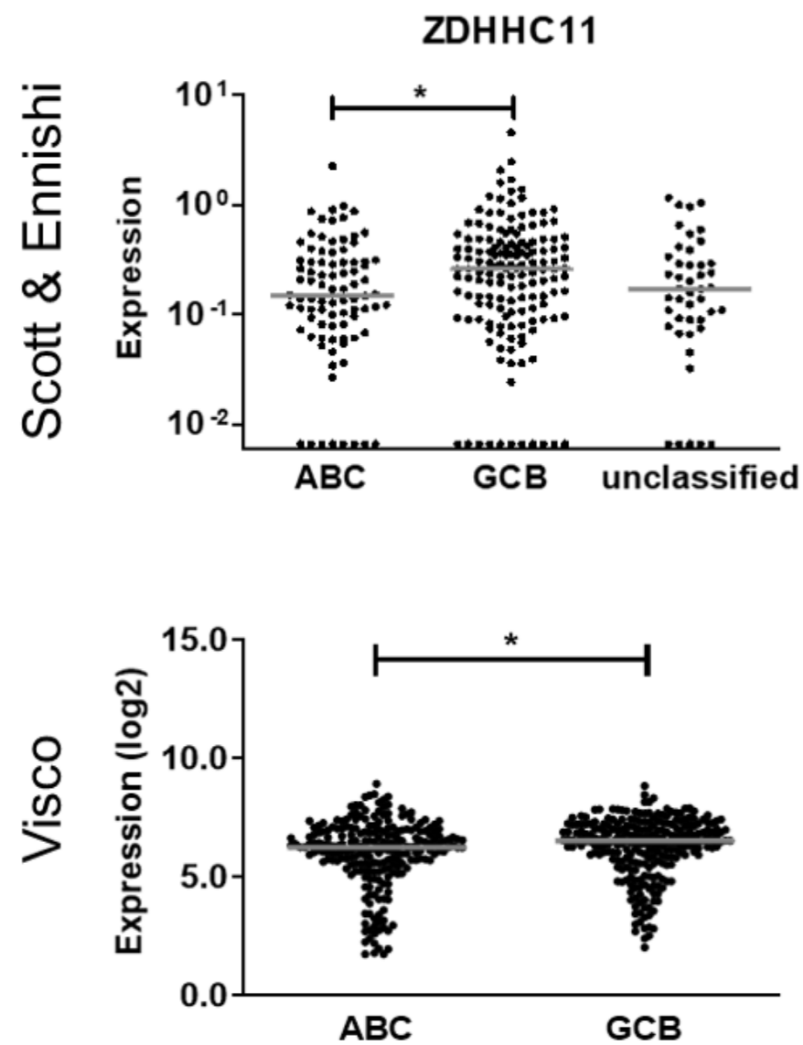

Supplement: s1 [file s1]

A

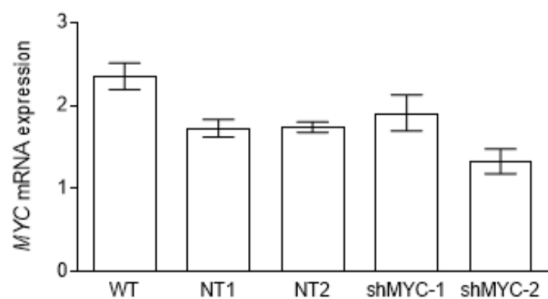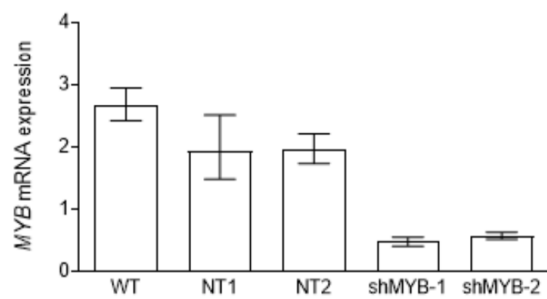

B

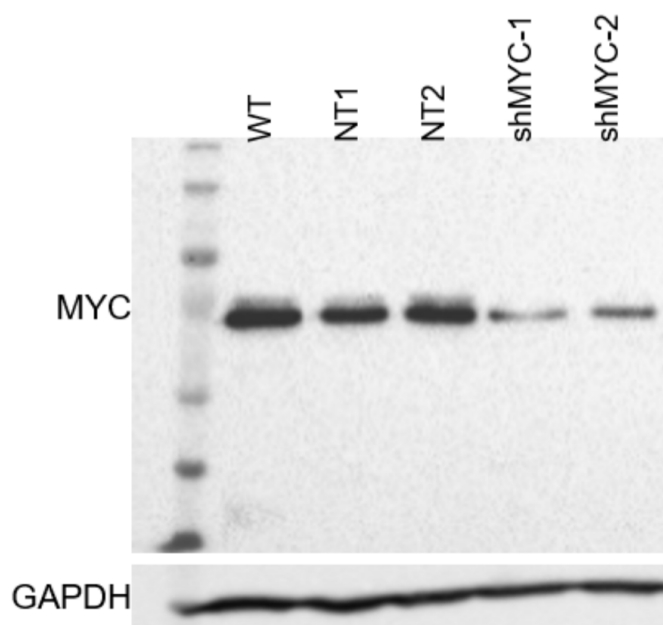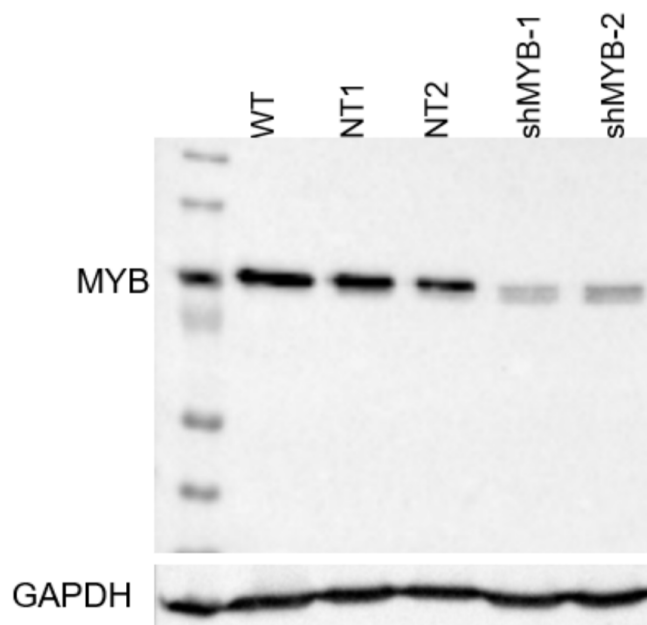

C

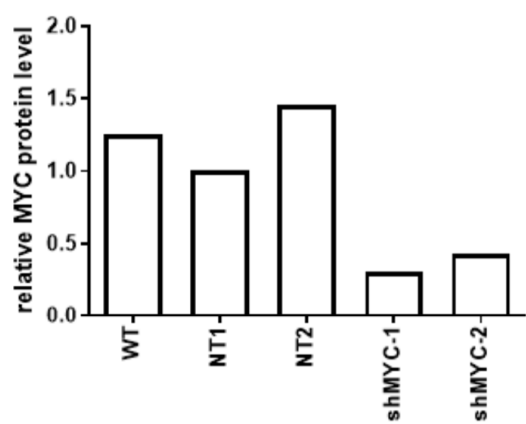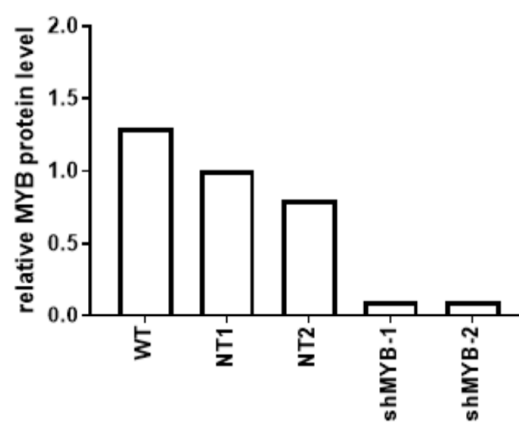

Supplement: s1 [file s1]

A

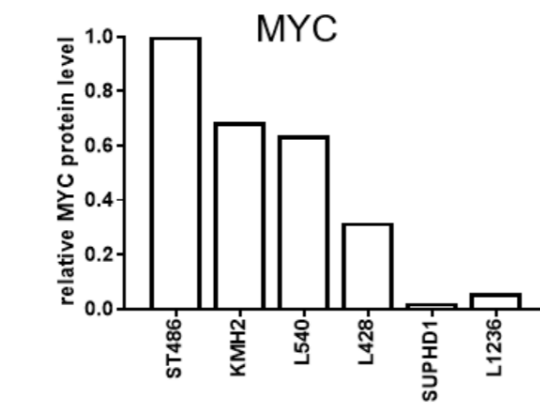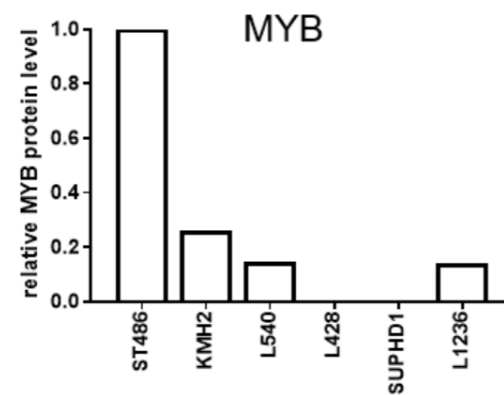

GAPDH

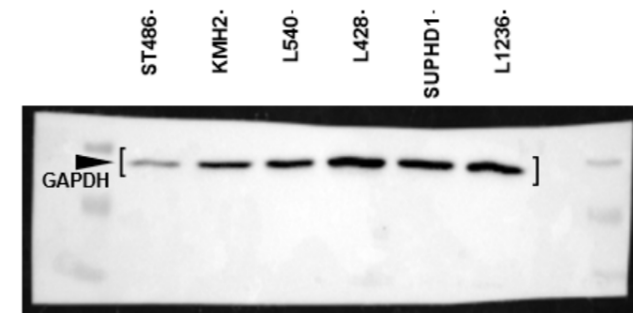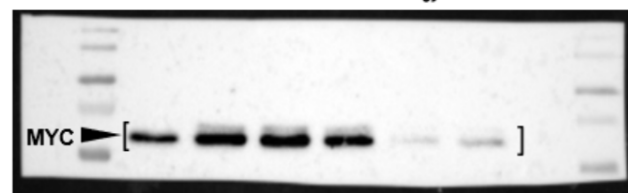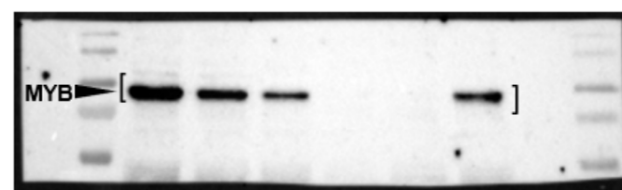

B

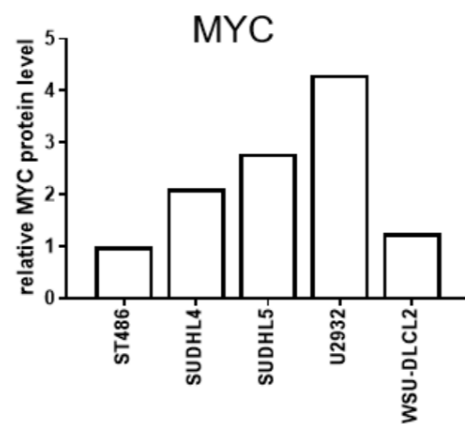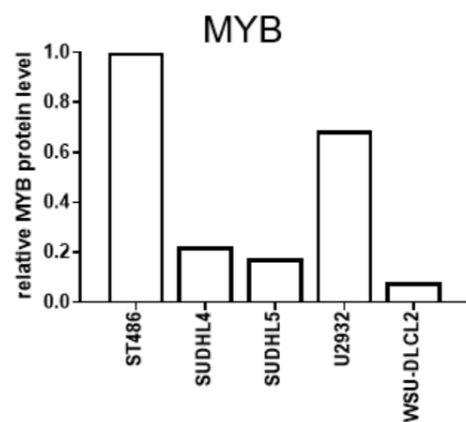

GAPDH

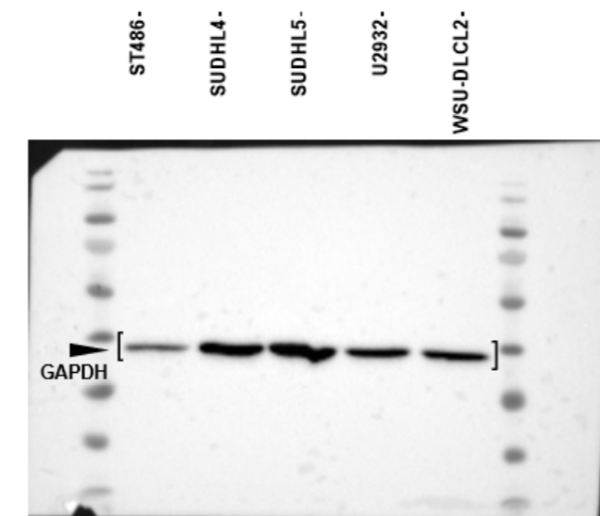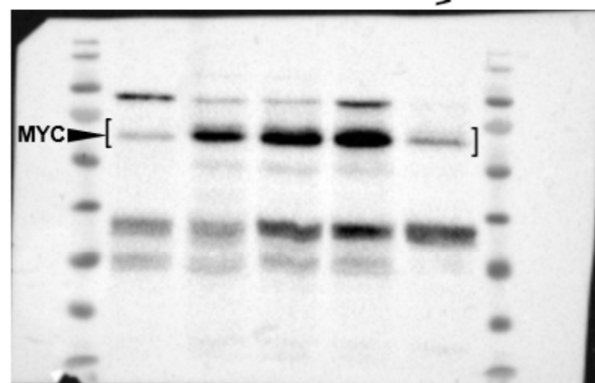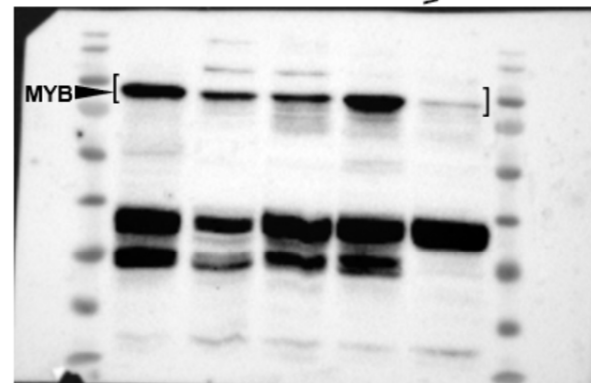

Supplement: s1 [file s1]

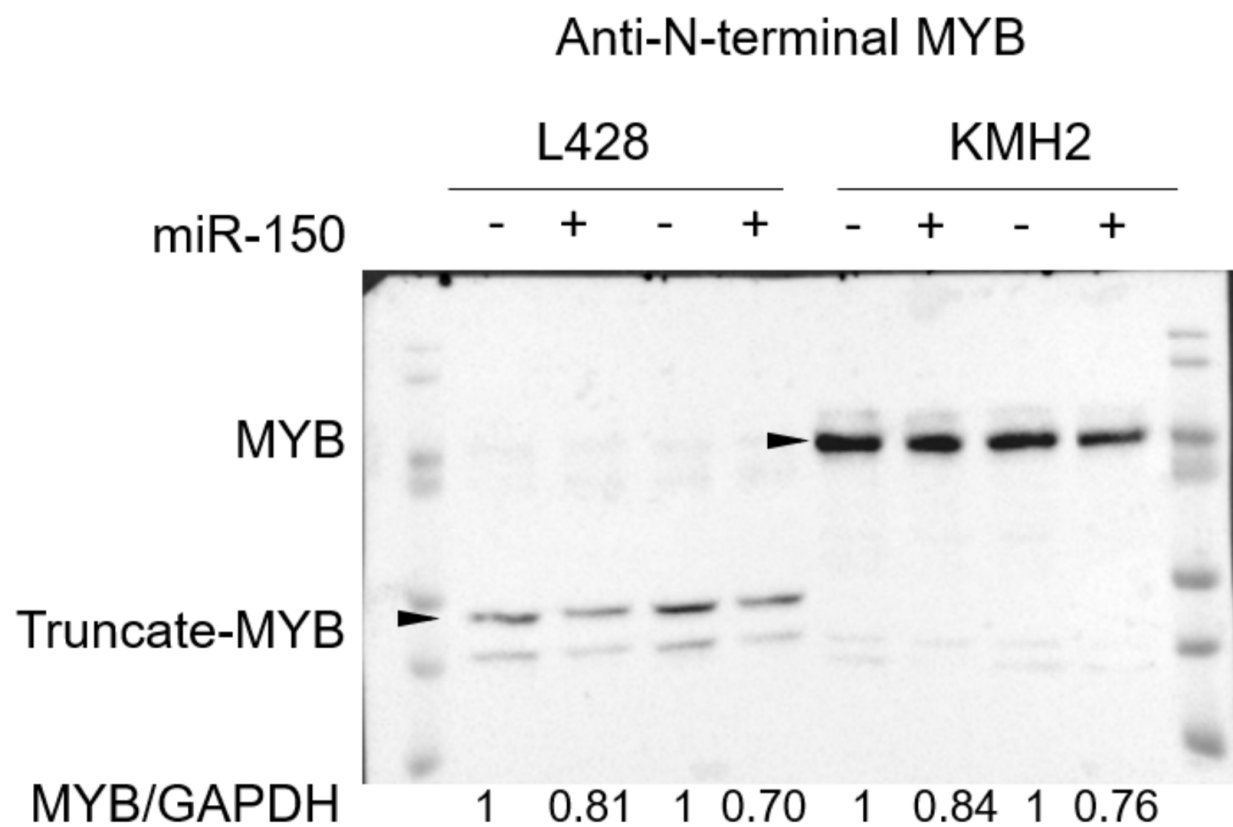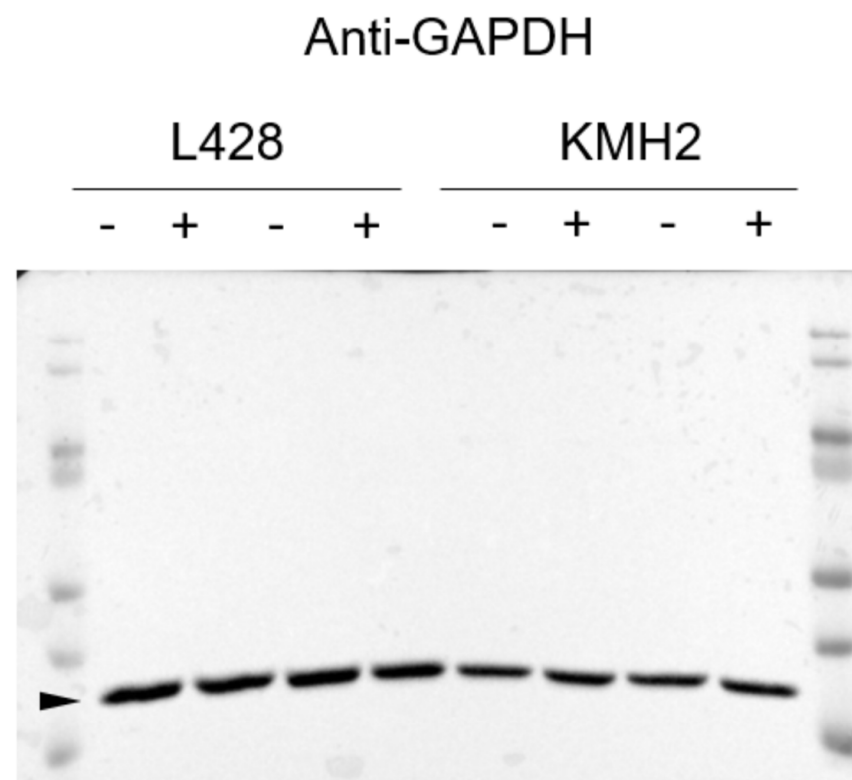

Supplement: s1 [file s1]
